# Supplementary material for: The Relationship Analysis on Corn Stalk Rot and Ear Rot According to Fusarium Species and Fumonisin Contamination in Kernels
Source: MDPI journal article supplement (doi:10.3390/toxins11060320), 2019-06-05
Supplement: s1 [file s1]

# Supplementary Materials: The Relationship Analysis on Corn Stalk Rot and Ear Rot according to *Fusarium* Species and Fumonisin Contamination in Kernels

Lina Li †, Qing Qu †, Zhiyan Cao \*, Zhengyu Guo, Hui Jia, Ning Liu, Yanhui Wang \* and Jingao Dong \*

† These authors contributed equally to this work.

**Table S1.** Isolation frequency of *Fusarium* species in 49 samples in 2016, 2017, 2018.

| Year | Sample Number | Maize Varieties | Geographic Location | Province | Parts of Maize | <i>F. verticillioides</i> | <i>F. oxysporum</i> | FGSC   | <i>F. proliferatum</i> | <i>F. equiseti</i> | <i>F. subglutinans</i> |
|------|---------------|-----------------|---------------------|----------|----------------|---------------------------|---------------------|--------|------------------------|--------------------|------------------------|
| 2016 | 1             | Zhengdan 958    | Changzhi            | Shanxi   | stalks         | 29.2%                     | 25.0%               | 8.3%   | 0.0%                   | 37.5%              | 0.0%                   |
|      |               |                 |                     |          | ear stems      | 20.0%                     | 40.0%               | 0.0%   | 0.0%                   | 40%                | 0.0%                   |
|      |               |                 |                     |          | corn seeds     | 0.0%                      | 0.0%                | 100.0% | 0.0%                   | 0.0%               | 0.0%                   |
|      | 2             | Luyu 1611       | Changzhi            | Shanxi   | stalks         | 16.0%                     | 16.0%               | 52.0%  | 0.0%                   | 16.0%              | 0.0%                   |
|      |               |                 |                     |          | ear stems      | 20.0%                     | 20.0%               | 40.0%  | 0.0%                   | 20.0%              | 0.0%                   |
|      |               |                 |                     |          | corn seeds     | 100.0%                    | 100.0%              | 0.0%   | 0.0%                   | 100.0%             | 0.0%                   |
|      | 3             | Xianyu 335      | Changzhi            | Shanxi   | stalks         | 16.7%                     | 20.8%               | 41.7%  | 0.0%                   | 20.8%              | 0.0%                   |
|      |               |                 |                     |          | ear stems      | 20.0%                     | 20.0%               | 40.0%  | 0.0%                   | 20.0%              | 0.0%                   |
|      |               |                 |                     |          | corn seeds     | 0.0%                      | 0.0%                | 100.0% | 0.0%                   | 0.0%               | 0.0%                   |
|      | 4             | Zhengdan 958    | Xinzhou             | Shanxi   | stalks         | 40.0%                     | 20.0%               | 16.0%  | 0.0%                   | 24.0%              | 0.0%                   |
|      |               |                 |                     |          | ear stems      | 60.0%                     | 20.0%               | 0.0%   | 0.0%                   | 20.0%              | 0.0%                   |
|      |               |                 |                     |          | corn seeds     | 16.7%                     | 16.7%               | 33.3%  | 0.0%                   | 0.0%               | 16.7%                  |
|      | 5             | Xianyu 335      | Xinzhou             | Shanxi   | stalks         | 33.3%                     | 20.8%               | 8.3%   | 0.0%                   | 37.5%              | 0.0%                   |
|      |               |                 |                     |          | ear stems      | 20.0%                     | 20.0%               | 40.0%  | 0.0%                   | 20.0%              | 0.0%                   |
|      |               |                 |                     |          | corn seeds     | 66.7%                     | 66.7%               | 0.0%   | 0.0%                   | 66.7%              | 0.0%                   |
|      | 6             | Longdan 9       | Pingliang           | Gansu    | stalks         | 15.8%                     | 10.5%               | 0.0%   | 0.0%                   | 26.3%              | 10.5%                  |
|      |               |                 |                     |          | ear stems      | 20.0%                     | 0.0%                | 0.0%   | 40.0                   | 40.0%              | 0.0%                   |
|      |               |                 |                     |          | corn seeds     | 60.0%                     | 86.7%               | 0.0%   | 0.0%                   | 60.0%              | 0.0%                   |
|      | 7             | Longdan 10      | Pingliang           | Gansu    | stalks         | 100.0%                    | 68.0%               | 0.0%   | 0.0%                   | 0.0%               | 0.0%                   |
|      |               |                 |                     |          | ear stems      | 60.0%                     | 40.0%               | 0.0%   | 0.0%                   | 0.0%               | 0.0%                   |
|      |               |                 |                     |          | corn seeds     | 100.0%                    | 0.0%                | 0.0%   | 0.0%                   | 0.0%               | 0.0%                   |
|      | 8             | Xianyu 335      | Pingliang           | Gansu    | stalks         | 32.0%                     | 0.0%                | 48.0%  | 0.0%                   | 20.0%              | 0.0%                   |
|      |               |                 |                     |          | ear stems      | 60.0%                     | 0.0%                | 0.0%   | 0.0%                   | 40.0%              | 0.0%                   |
|      |               |                 |                     |          | corn seeds     | 0.0%                      | 0.0%                | 0.0%   | 0.0%                   | 0.0%               | 0.0%                   |
|      | 9             | Zhengdan 958    | Pingliang           | Gansu    | stalks         | 36.0%                     | 16.0%               | 0.0%   | 0.0%                   | 40.0%              | 4.0%                   |
|      |               |                 |                     |          | ear stems      | 33.3%                     | 33.3%               | 0.0%   | 0.0%                   | 33.3%              | 0.0%                   |
|      |               |                 |                     |          | corn seeds     | 0.0%                      | 0.0%                | 0.0%   | 0.0%                   | 0.0%               | 0.0%                   |
|      | 10            | Wuke 609        | Wuwei               | Gansu    | stalks         | 0.0%                      | 24.0%               | 28.0%  | 0.0%                   | 40.0%              | 8.0%                   |

|      |              |              |         |              |            |        |        |       |        |       |
|------|--------------|--------------|---------|--------------|------------|--------|--------|-------|--------|-------|
|      |              |              |         | ear stems    | 0.0%       | 0.0%   | 80.0%  | 0.0%  | 20.0%  | 0.0%  |
|      |              |              |         | corn seeds   | 46.7%      | 100.0% | 0.0%   | 0.0%  | 0.0%   | 0.0%  |
|      |              |              |         | stalks       | 28.0%      | 20.0%  | 0.0%   | 0.0%  | 52.0%  | 0.0%  |
| 11   | Zhengdan 958 | Wuwei        | Gansu   | ear stems    | 40.0%      | 20.0%  | 0.0%   | 0.0%  | 40.0%  | 0.0%  |
|      |              |              |         | corn seeds   | 56.7%      | 56.7%  | 0.0%   | 13.3% | 0.0%   | 0.0%  |
|      |              |              |         | stalks       | 12.5%      | 20.8%  | 0.0%   | 0.0%  | 4.2%   | 12.5% |
| 12   | Xianyu 335   | Wuwei        | Gansu   | ear stems    | 0.0%       | 0.0%   | 0.0%   | 0.0%  | 80.0%  | 0.0%  |
|      |              |              |         | corn seeds   | 0.0%       | 60.0%  | 0.0%   | 0.0%  | 60.0%  | 60.0% |
|      |              |              |         | stalks       | 0.0%       | 23.8%  | 4.8%   | 19.0% | 38.1%  | 0.0%  |
| 13   | Wuke 620     | Wuwei        | Gansu   | ear stems    | 0.0%       | 0.0%   | 0.0%   | 40.0% | 80.0   | 0.0%  |
|      |              |              |         | corn seeds   | 23.3%      | 100.0% | 0.0%   | 0.0%  | 0.0%   | 0.0%  |
|      |              |              |         | stalks       | 42.9%      | 14.3%  | 23.8%  | 0.0%  | 14.3%  | 4.8%  |
| 14   | Wuke 617     | Wuwei        | Gansu   | ear stems    | 100.0%     | 0.0%   | 0.0%   | 0.0%  | 0.0%   | 0.0%  |
|      |              |              |         | corn seeds   | 40.0%      | 0.0%   | 0.0%   | 0.0%  | 0.0%   | 0.0%  |
|      |              |              |         | stalks       | 15.8%      | 0.0%   | 63.2%  | 0.0%  | 21.1%  | 0.0%  |
| 15   | Zhengdan 958 | Changwu      | Shaanxi | ear stems    | 0.0%       | 0.0%   | 0.0%   | 50.0% | 50.0%  | 0.0%  |
|      |              |              |         | corn seeds   | 100.0%     | 100.0% | 0.0%   | 0.0%  | 100.0% | 0.0%  |
|      |              |              |         | stalks       | 28.6%      | 23.8%  | 4.8%   | 4.8%  | 38.1%  | 0.0%  |
| 16   | Xianyu 335   | Changwu      | Shaanxi | ear stems    | 50.0%      | 50.0%  | 0.0%   | 0.0%  | 50.0%  | 0.0%  |
|      |              |              |         | corn seeds   | 0.0%       | 0.0%   | 0.0%   | 0.0%  | 0.0%   | 0.0%  |
|      |              |              |         | stalks       | 23.8%      | 14.3%  | 0.0%   | 0.0%  | 61.9%  | 0.0%  |
| 17   | Shandan 609  | Changwu      | Shaanxi | ear stems    | 0.0%       | 0.0%   | 60.0%  | 0.0%  | 0.0%   | 0.0%  |
|      |              |              |         | corn seeds   | 0.0%       | 0.0%   | 76.7%  | 0.0%  | 0.0%   | 0.0%  |
|      |              |              |         | stalks       | 20.8%      | 20.8%  | 37.5%  | 0.0%  | 25.0%  | 0.0%  |
| 18   | Zhengdan 958 | Yulin        | Shaanxi | ear stems    | 25.0%      | 25.0%  | 0.0%   | 0.0%  | 80.0%  | 0.0%  |
|      |              |              |         | corn seeds   | 50.0%      | 50.0%  | 46.7%  | 0.0%  | 0.0%   | 0.0%  |
|      |              |              |         | stalks       | 17.4%      | 30.4%  | 30.4%  | 0.0%  | 21.7%  | 0.0%  |
| 19   | Longdan 9    | Yongning     | Ningxia | ear stems    | 20.0%      | 40.0%  | 0.0%   | 0.0%  | 40.0%  | 0.0%  |
|      |              |              |         | corn seeds   | 0.0%       | 0.0%   | 0.0%   | 0.0%  | 0.0%   | 0.0%  |
|      |              |              |         | stalks       | 24.0%      | 28.0%  | 0.0%   | 0.0%  | 48.0%  | 0.0%  |
| 20   | Xianyu 335   | Tongxin      | Ningxia | ear stems    | 20.0%      | 40.0%  | 0.0%   | 0.0%  | 40.0%  | 0.0%  |
|      |              |              |         | corn seeds   | 0.0%       | 0.0%   | 0.0%   | 0.0%  | 0.0%   | 0.0%  |
| 2017 | 21           | Zhengdan 958 | Harbin  | Heilongjiang | stalks     | 96.0%  | 96.0%  | 0.0%  | 0.0%   | 0.0%  |
|      |              |              |         |              | ear stems  | 100.0% | 100.0% | 0.0%  | 0.0%   | 0.0%  |
|      |              |              |         |              | corn seeds | 36.7%  | 0.0%   | 0.0%  | 0.0%   | 0.0%  |
|      | 22           | Keyu 16      | Harbin  | Heilongjiang | stalks     | 60.0%  | 60.0%  | 0.0%  | 0.0%   | 0.0%  |
|      |              |              |         |              | ear stems  | 80.0%  | 80.0%  | 0.0%  | 0.0%   | 0.0%  |
|      |              |              |         |              | corn seeds | 46.7%  | 46.7%  | 0.0%  | 36.7%  | 0.0%  |
|      | 23           | Xianyu 335   | Changwu | Shaanxi      | stalks     | 64.0%  | 64.0%  | 20.0% | 0.0%   | 0.0%  |
|      |              |              |         |              | ear stems  | 100.0% | 100.0% | 0.0%  | 0.0%   | 0.0%  |

|      |    |              |          |                |           |        |        |        |       |        |
|------|----|--------------|----------|----------------|-----------|--------|--------|--------|-------|--------|
|      |    |              |          | corn seeds     | 0.0%      | 0.0%   | 100.0% | 0.0%   | 0.0%  | 0.0%   |
|      |    |              |          | stalks         | 16.0%     | 16.0%  | 8.0%   | 0.0%   | 24.0% | 0.0%   |
|      | 24 | Xianyu 696   | Changzhi | Shanxi         | ear stems | 0.0%   | 0.0%   | 100.0% | 0.0%  | 0.0%   |
|      |    |              |          | corn seeds     | 0.0%      | 0.0%   | 100.0% | 0.0%   | 0.0%  | 0.0%   |
|      |    |              |          | stalks         | 76.0%     | 76.0%  | 0.0%   | 0.0%   | 0.0%  | 0.0%   |
|      | 25 | Zhengdan 958 | Tieling  | Liaoning       | ear stems | 80.0%  | 80.0%  | 0.0%   | 0.0%  | 80.0%  |
|      |    |              |          | corn seeds     | 100.0%    | 0.0%   | 0.0%   | 0.0%   | 0.0%  | 0.0%   |
|      |    |              |          | stalks         | 100.0%    | 100.0% | 0.0%   | 100.0% | 0.0%  | 0.0%   |
|      | 26 | Xianyu 335   | Tieling  | Liaoning       | ear stems | 80.0%  | 80.0%  | 0.0%   | 80.0% | 0.0%   |
|      |    |              |          | corn seeds     | 80.0%     | 0.0%   | 0.0%   | 0.0%   | 0.0%  | 0.0%   |
|      |    |              |          | stalks         | 56.0 %    | 56.0%  | 0.0%   | 0.0%   | 0.0%  | 0.0%   |
|      | 27 | Xianyu 335   | Shenyang | Liaoning       | ear stems | 60.0%  | 0.0%   | 0.0%   | 0.0%  | 0.0%   |
|      |    |              |          | corn seeds     | 50.0%     | 50.0%  | 0.0%   | 0.0%   | 0.0%  | 0.0%   |
|      |    |              |          | stalks         | 48.0%     | 28.0%  | 0.0%   | 0.0%   | 0.0%  | 0.0%   |
|      | 28 | Zhengdan 958 | Panjin   | Liaoning       | ear stems | 20.0%  | 20.0%  | 0.0%   | 0.0%  | 100.0% |
|      |    |              |          | corn seeds     | 53.3%     | 3.3%   | 43.3%  | 0.0%   | 0.0%  | 0.0%   |
|      |    |              |          | stalks         | 60.0%     | 60.0%  | 0.0%   | 0.0%   | 0.0%  | 0.0%   |
|      | 29 | Zhengdan 958 | Shenyang | Liaoning       | ear stems | 0.0%   | 0.0%   | 0.0%   | 0.0%  | 20.0%  |
|      |    |              |          | corn seeds     | 100.0%    | 0.0%   | 0.0%   | 0.0%   | 0.0%  | 0.0%   |
|      |    |              |          | stalks         | 48.0%     | 28.0%  | 0.0%   | 12.0%  | 0.0%  | 0.0%   |
|      | 30 | Xianyu 335   | Tonghua  | Jilin          | ear stems | 60.0%  | 0.0%   | 0.0%   | 0.0%  | 0.0%   |
|      |    |              |          | corn seeds     | 100.0%    | 0.0%   | 0.0%   | 100.0% | 0.0%  | 0.0%   |
|      |    |              |          | stalks         | 52.0%     | 36.0%  | 0.0%   | 0.0%   | 0.0%  | 0.0%   |
|      | 31 | Qingchu 368  | Tongliao | Inner Mongolia | ear stems | 100.0% | 100.0% | 0.0%   | 0.0%  | 0.0%   |
|      |    |              |          | corn seeds     | 100.0%    | 0.0%   | 0.0%   | 0.0%   | 0.0%  | 0.0%   |
|      |    |              |          | stalks         | 84.0%     | 84.0%  | 0.0%   | 0.0%   | 0.0%  | 0.0%   |
|      | 32 | Zhengdan 958 | Tongxin  | Ningxia        | ear stems | 100.0% | 100.0% | 0.0%   | 0.0%  | 0.0%   |
|      |    |              |          | corn seeds     | 100.0%    | 100.0% | 0.0%   | 0.0%   | 0.0%  | 0.0%   |
|      |    |              |          | stalks         | 60.0%     | 60.0%  | 0.0%   | 0.0%   | 0.0%  | 0.0%   |
|      | 33 | Xianyu 335   | Tongxin  | Ningxia        | ear stems | 100.0% | 40.0%  | 40.0%  | 0.0%  | 0.0%   |
|      |    |              |          | corn seeds     | 90.0%     | 90.0%  | 0.0%   | 0.0%   | 0.0%  | 0.0%   |
|      |    |              |          | stalks         | 36.0%     | 0.0%   | 0.0%   | 0.0%   | 0.0%  | 0.0%   |
|      | 34 | Shandan 609  | Yulin    | Shaanxi        | ear stems | 60.0%  | 0.0%   | 20.0%  | 0.0%  | 40.0%  |
|      |    |              |          | corn seeds     | 0.0%      | 6.7%   | 0.0%   | 0.0%   | 6.7%  | 0.0%   |
|      |    |              |          | stalks         | 32.0%     | 0.0%   | 0.0%   | 0.0%   | 20.0% | 0.0%   |
| 2018 | 35 | Zhengdan 958 | Yulin    | Shaanxi        | ear stems | 0.0%   | 0.0%   | 20.0%  | 0.0%  | 100.0% |
|      |    |              |          | corn seeds     | 100.0%    | 0.0%   | 0.0%   | 0.0%   | 0.0%  | 0.0%   |
|      |    |              |          | stalks         | 48.0%     | 40.0%  | 0.0%   | 0.0%   | 0.0%  | 0.0%   |
|      | 36 | Xianyu 335   | Changwu  | Shaanxi        | ear stems | 0.0%   | 40.0%  | 100.0% | 0.0%  | 0.0%   |
|      |    |              |          | corn seeds     | 43.3%     | 6.7%   | 0.0%   | 0.0%   | 0.0%  | 0.0%   |

|    |              |          |         |            |        |       |        |       |       |       |
|----|--------------|----------|---------|------------|--------|-------|--------|-------|-------|-------|
| 37 | Xianyu 335   | Changzhi | Shanxi  | stalks     | 4.0%   | 0.0%  | 48.0%  | 0.0%  | 0.0%  | 0.0%  |
|    |              |          |         | ear stems  | 0.0%   | 0.0%  | 100.0% | 40.0% | 0.0%  | 0.0%  |
|    |              |          |         | corn seeds | 16.7%  | 0.0%  | 0.0%   | 6.7%  | 0.0%  | 0.0%  |
| 38 | Zhengdan 958 | Changzhi | Shanxi  | stalks     | 4.0%   | 0.0%  | 92.0%  | 0.0%  | 0.0%  | 0.0%  |
|    |              |          |         | ear stems  | 0.0%   | 0.0%  | 80.0%  | 0.0%  | 0.0%  | 0.0%  |
|    |              |          |         | corn seeds | 23.3%  | 0.0%  | 0.0%   | 0.0%  | 0.0%  | 0.0%  |
| 39 | Dika 517     | Changzhi | Shanxi  | stalks     | 0.0%   | 0.0%  | 100.0% | 0.0%  | 0.0%  | 0.0%  |
|    |              |          |         | ear stems  | 0.0%   | 40.0% | 0.0%   | 0.0%  | 0.0%  | 0.0%  |
|    |              |          |         | corn seeds | 10.0%  | 6.7%  | 0.0%   | 0.0%  | 16.7% | 0.0%  |
| 40 | Xianyu 335   | Xinzhou  | Shanxi  | stalks     | 4.0%   | 0.0%  | 0.0%   | 0.0%  | 0.0%  | 0.0%  |
|    |              |          |         | ear stems  | 60.0%  | 0.0%  | 0.0%   | 0.0%  | 0.0%  | 40.0% |
|    |              |          |         | corn seeds | 43.3%  | 0.0%  | 0.0%   | 0.0%  | 0.0%  | 6.7%  |
| 41 | Zhengdan 958 | Xinzhou  | Shanxi  | stalks     | 20.0%  | 0.0%  | 48.0%  | 0.0%  | 0.0%  | 0.0%  |
|    |              |          |         | ear stems  | 80.0%  | 0.0%  | 0.0%   | 0.0%  | 0.0%  | 0.0%  |
|    |              |          |         | corn seeds | 10.0%  | 0.0%  | 56.7%  | 0.0%  | 0.0%  | 0.0%  |
| 42 | M753         | Xinzhou  | Shanxi  | stalks     | 16.0%  | 0.0%  | 52.0%  | 0.0%  | 4.0%  | 0.0%  |
|    |              |          |         | ear stems  | 60.0%  | 0.0%  | 40.0%  | 0.0%  | 0.0%  | 0.0%  |
|    |              |          |         | corn seeds | 90.0%  | 0.0%  | 0.0%   | 0.0%  | 0.0%  | 0.0%  |
| 43 | Dafeng 30    | Xinzhou  | Shanxi  | stalks     | 40.0%  | 0.0%  | 88.0%  | 0.0%  | 0.0%  | 0.0%  |
|    |              |          |         | ear stems  | 100.0% | 40.0% | 0.0%   | 0.0%  | 0.0%  | 0.0%  |
|    |              |          |         | corn seeds | 100.0% | 6.7%  | 0.0%   | 0.0%  | 0.0%  | 0.0%  |
| 44 | Yufeng 303   | Xinzhou  | Shanxi  | stalks     | 4.0%   | 0.0%  | 68.0%  | 0.0%  | 0.0%  | 0.0%  |
|    |              |          |         | ear stems  | 100.0% | 0.0%  | 20.0%  | 0.0%  | 0.0%  | 0.0%  |
|    |              |          |         | corn seeds | 76.7%  | 0.0%  | 0.0%   | 0.0%  | 0.0%  | 0.0%  |
| 45 | Zhengdan 958 | Tongxin  | Ningxia | stalks     | 20.0%  | 0.0%  | 88.0%  | 0.0%  | 0.0%  | 0.0%  |
|    |              |          |         | ear stems  | 0.0%   | 0.0%  | 60.0%  | 40.0% | 0.0%  | 0.0%  |
|    |              |          |         | corn seeds | 40.0%  | 0.0%  | 73.3%  | 6.7%  | 0.0%  | 0.0%  |
| 46 | Xianyu 335   | Tongxin  | Ningxia | stalks     | 52.0%  | 0.0%  | 0.0%   | 0.0%  | 0.0%  | 0.0%  |
|    |              |          |         | ear stems  | 100.0% | 0.0%  | 20.0%  | 0.0%  | 0.0%  | 40.0% |
|    |              |          |         | corn seeds | 0.0%   | 0.0%  | 46.7%  | 0.0%  | 0.0%  | 6.7%  |
| 47 | Zhengdan 958 | Zhenyuan | Gansu   | stalks     | 56.0%  | 0.0%  | 72.0%  | 0.0%  | 0.0%  | 0.0%  |
|    |              |          |         | ear stems  | 0.0%   | 0.0%  | 60.0%  | 0.0%  | 0.0%  | 0.0%  |
|    |              |          |         | corn seeds | 33.3%  | 0.0%  | 0.0%   | 0.0%  | 0.0%  | 0.0%  |
| 48 | Xianyu 335   | Zhenyuan | Gansu   | stalks     | 20.0%  | 0.0%  | 80.0%  | 0.0%  | 12.0% | 0.0%  |
|    |              |          |         | ear stems  | 60.0%  | 0.0%  | 20.0%  | 0.0%  | 0.0%  | 0.0%  |
|    |              |          |         | corn seeds | 6.7%   | 0.0%  | 0.0%   | 0.0%  | 0.0%  | 0.0%  |
| 49 | Yuyu 22      | Zhenyuan | Gansu   | stalks     | 60.0%  | 0.0%  | 0.0%   | 0.0%  | 0.0%  | 0.0%  |
|    |              |          |         | ear stems  | 0.0%   | 40.0% | 100.0% | 0.0%  | 0.0%  | 0.0%  |
|    |              |          |         | corn seeds | 16.7%  | 6.7%  | 23.3%  | 0.0%  | 0.0%  | 0.0%  |

Table S2. Sampling information.

| Region    | No. of Total Samples | Average Temperature (°C) | Mean Relative Humidity (%) | Sample Year |
|-----------|----------------------|--------------------------|----------------------------|-------------|
| Wuwei     | 5                    | 25                       | 38                         | 2016        |
| Pingliang | 4                    | 23                       | 60                         | 2016        |
| Changzhi  | 3                    | 25                       | 58                         | 2016        |
| Changwu   | 3                    | 22                       | 47                         | 2016        |
| Xinzhou   | 2                    | 25                       | 55                         | 2016        |
| Yulin     | 1                    | 23                       | 44                         | 2016        |
| Yongning  | 1                    | 27                       | 39                         | 2016        |
| Tongxin   | 1                    | 26                       | 40                         | 2016        |
| Harbin    | 2                    | 21                       | 63                         | 2017        |
| Tieling   | 2                    | 24                       | 67                         | 2017        |
| Shenyang  | 2                    | 24                       | 60                         | 2017        |
| Tongxin   | 2                    | 24                       | 38                         | 2017        |
| Changwu   | 1                    | 20                       | 55                         | 2017        |
| Changzhi  | 1                    | 24                       | 55                         | 2017        |
| Panjin    | 1                    | 25                       | 66                         | 2017        |
| Tonghua   | 1                    | 23                       | 72                         | 2017        |
| Tongliao  | 1                    | 24                       | 51                         | 2017        |
| Xinzhou   | 5                    | 22                       | 54                         | 2018        |
| Zhenyuan  | 3                    | 21                       | 57                         | 2018        |
| Changzhi  | 3                    | 21                       | 57                         | 2018        |
| Yulin     | 2                    | 19                       | 45                         | 2018        |
| Tongxin   | 2                    | 21                       | 42                         | 2018        |
| Changwu   | 1                    | 20                       | 45                         | 2018        |

Table S3. Sample collection of corn stalk rot.

| Province | Geographic Location | Year | Zhengdan 958 | Xianyu 335 | Local Main Varieties          |
|----------|---------------------|------|--------------|------------|-------------------------------|
| Shanxi   | Changzhi            | 2016 | √            | √          | Luyu 1611                     |
|          |                     | 2017 |              |            | Xianyu 696                    |
|          |                     | 2018 | √            | √          | Dika 517                      |
|          | Xinzhou             | 2016 | √            | √          |                               |
|          |                     | 2018 | √            | √          | M753<br>Dafeng30<br>Yufeng303 |
| Shaanxi  | Changwu             | 2016 | √            | √          | Shandan 609                   |
|          |                     | 2017 |              | √          |                               |
|          |                     | 2018 |              | √          |                               |
|          | Yulin               | 2016 | √            |            |                               |
|          |                     | 2018 | √            |            | Shandan 609                   |
| Ningxia  | Tongxin             | 2016 |              | √          |                               |
|          |                     | 2017 | √            | √          |                               |
|          |                     | 2018 | √            | √          |                               |

**Table S4.** Supplementary samples of corn stalk rot.

| Province       | Geographic Location | Year | Zhengdan 958 | Xianyu 335 | Local Main Varieties             |
|----------------|---------------------|------|--------------|------------|----------------------------------|
| Gansu          | Pingliang           | 2016 | √            | √          | Longdan 9<br>Longdan 10          |
|                | Wuwei               | 2016 | √            | √          | Wuke 609<br>Wuke 620<br>Wuke 617 |
|                | Zhenyuan            | 2018 | √            | √          | Yuyu 22                          |
| Ningxia        | Yongning            | 2016 |              |            | Longdan 9                        |
| Heilongjiang   | Harbin              | 2017 | √            |            | Keyu 16                          |
| Liaoning       | Tieling             | 2017 | √            | √          |                                  |
|                | Shenyang            | 2017 | √            | √          |                                  |
|                | Panjin              | 2017 | √            |            |                                  |
| Jilin          | Tonghua             | 2017 |              | √          |                                  |
| Inner Mongolia | Tongliao            | 2017 |              |            | Qingchu 368                      |
